# Supplementary material
Source: PubMed Central journal article supplement (PMC3196611)

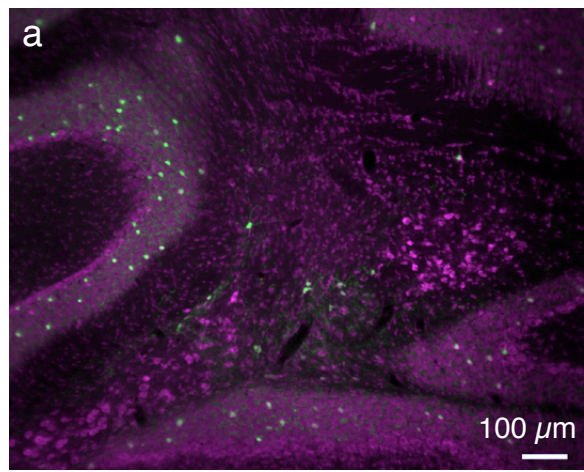

**Supplemental Figure 1**  
**Distribution of GlyT2-GFP neurons in the fastigial nucleus.**

Coronal sections of the GlyT2-GFP cerebellum counterstained with NeuroTrace (fluorescent Nissl, magenta). a) Caudal, ~-6.63 Bregma. b) Mid-rostral, ~-6.48 Bregma. c) Rostral, ~-6.27 Bregma. Fas, fastigial nucleus. Int, interpositus nucleus. IV, fourth ventricle. Scale bar applies to all panels.

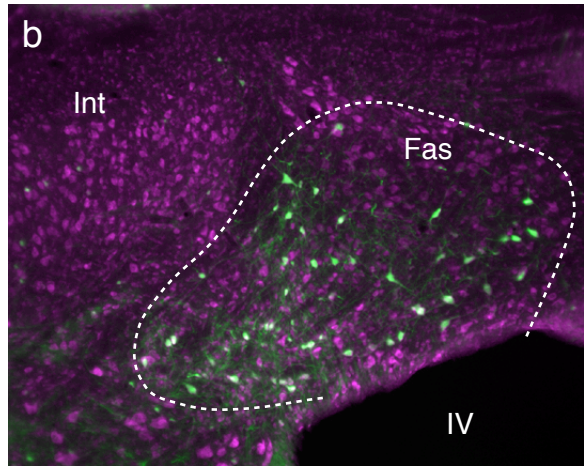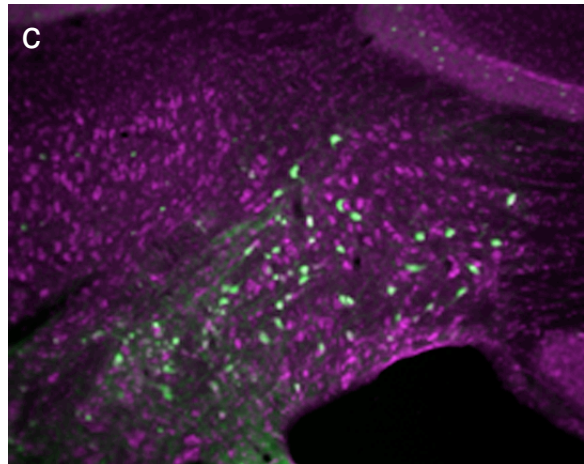

Supplement: NIHMS141246-supplement-Supp1.pdf [file NIHMS141246-supplement-Supp1.pdf]
